# Supplementary material for: Sacha Inchi Oil Press-Cake Protein Hydrolysates Exhibit Anti-Hyperuricemic Activity via Attenuating Renal Damage and Regulating Gut Microbiota
Source: MDPI journal article supplement (doi:10.3390/foods11162534), 2022-08-22
Supplement: s1 [file s1]

**Supplementary Information**

# **Sacha Inchi Oil Press-Cake Protein Hydrolysates Exhibit Anti-Hyperuricemic Activity via Attenuating Renal Damage and Regulating Gut Microbiota**

**Kun Wang, Shanshan Wu, Pan Li, Nan Xiao, Jiamin Wen, Jinming Lin, Siming Lu, Xin Cai, Yanan Xu and Bing Du \***

College of Food Science, South China Agricultural University, Guangzhou  
510642, China

\* Correspondence: [dubing@scau.edu.cn](mailto:dubing@scau.edu.cn)

## **Contents**

Table S1. Identification results of potential biomarkers of SISH treated hyperuricemic rats.

Table S2. Identification results of potential genes of SISH treated hyperuricemic rats.

Figure S1. The serum UA levels in rats after adenine and potassium oxonate treatment for 10 days.

Figure S2. The comparison of several specific taxa between the four groups.

Figure S3. GO enrichment analysis between the CD and MG group.

Figure S4. GO enrichment analysis between the SISH and MG group

Table S1. Identification results of potential biomarkers of SISH treated hyperuricemic rats.

| Name             | Formula                                                      | Molecular Weight | RT [min] | CD vs MG |                | SISH vs MG |                | DG vs MG |                |
|------------------|--------------------------------------------------------------|------------------|----------|----------|----------------|------------|----------------|----------|----------------|
|                  |                                                              |                  |          | log2FC   | <i>P</i> value | log2FC     | <i>P</i> value | log2FC   | <i>P</i> value |
| Uric acid        | C <sub>5</sub> H <sub>4</sub> N <sub>4</sub> O <sub>3</sub>  | 168.0286         | 1.39     | -0.56334 | 0.017451       | -0.79565   | 0.00818        | -0.49106 | 0.039769       |
| 2'-Deoxycytidine | C <sub>9</sub> H <sub>13</sub> N <sub>3</sub> O <sub>4</sub> | 227.0908         | 1.375    | 0.340359 | 0.013731       | 0.207622   | 0.038931       | 0.208908 | 0.136709       |
| L-Threonine      | C <sub>4</sub> H <sub>9</sub> NO <sub>3</sub>                | 119.0584         | 1.317    | 0.66064  | 0.002534       | 0.570697   | 0.030766       | 0.475711 | 0.002168       |
| DL-Carnitine     | C <sub>7</sub> H <sub>15</sub> NO <sub>3</sub>               | 161.1054         | 1.308    | 0.771147 | 3.28E-05       | 0.207622   | 0.038931       | 0.208908 | 0.136709       |
| Tiglylcarnitine  | C <sub>12</sub> H <sub>21</sub> NO <sub>4</sub>              | 243.1474         | 10.543   | 4.342748 | 0.003476       | 4.364824   | 0.00036        | 4.480659 | 0.000111       |
| Oleic acid       | C <sub>18</sub> H <sub>34</sub> O <sub>2</sub>               | 282.2563         | 13.165   | -0.85889 | 0.010961       | -0.37712   | 0.093781       | -0.97005 | 0.00355        |
| D-Sphingosine    | C <sub>18</sub> H <sub>37</sub> NO <sub>2</sub>              | 299.2827         | 13.036   | -0.66207 | 0.005482       | -0.36393   | 0.117863       | -0.62886 | 0.00207        |

Table S2. Identification results of potential genes of SISH treated hyperuricemic rats.

|                   |         | Gene ID | Gene_description                                                     | FPKM     |          |          |          | <i>p</i> value |            |          |
|-------------------|---------|---------|----------------------------------------------------------------------|----------|----------|----------|----------|----------------|------------|----------|
|                   |         |         |                                                                      | CD       | MG       | TS       | DG       | CD vs MG       | SISH vs MG | DG vs MG |
|                   | Xdh     | 497811  | xanthine dehydrogenase                                               | 23.45382 | 41.46954 | 26.4438  | 27.42506 | 1.35E-11       | 0.00013    | 6.13E-05 |
|                   | Hsh     | 293613  | 5-hydroxyisourate hydrolase                                          | 0.85316  | 0.457308 | 1.891492 | 1.200592 | 0.048056       | 3.69E-05   | 0.001063 |
| Purine metabolism | Gucy1α3 | 497757  | guanylate cyclase 1 soluble subunit alpha 3%2C transcript variant X3 | 2.550802 | 6.251409 | 3.063274 | 3.556875 | 2.79E-05       | 0.004153   | 0.01219  |
|                   | Gucy1β3 | 25202   | guanylate cyclase 1 soluble subunit beta 3                           | 2.144531 | 4.554913 | 2.149856 | 2.832124 | 0.000207       | 0.000398   | 0.022819 |
|                   | Pde7a   | 81744   | phosphodiesterase 7A                                                 | 0.84849  | 1.488257 | 0.843783 | 1.085454 | 0.000775       | 0.005719   | 0.080955 |

|                                   |        |        |                                                                           |          |          |          |          |          |          |          |
|-----------------------------------|--------|--------|---------------------------------------------------------------------------|----------|----------|----------|----------|----------|----------|----------|
|                                   | Pde11a | 140928 | phosphodiesterase 11A%2C transcript variant 3                             | 0.339043 | 0.524972 | 0.285331 | 0.364973 | 0.020632 | 0.011814 | 0.024277 |
|                                   | Prim2  | 301323 | primase%2C DNA%2C polypeptide 2%2C transcript variant X3                  | 3.332274 | 2.151712 | 3.421895 | 3.389925 | 0.019147 | 0.008924 | 0.041126 |
|                                   | Nme7   | 171566 | NME/NM23 family member 7                                                  | 15.39423 | 9.511376 | 17.96419 | 13.75155 | 0.003143 | 0.000396 | 0.025182 |
|                                   | Entpd8 | 613267 | ectonucleoside triphosphate diphosphohydrolase 8%2C transcript variant X2 | 1.072657 | 0.52895  | 1.322952 | 0.841691 | 0.044028 | 0.011881 | 0.161162 |
| <hr/>                             |        |        |                                                                           |          |          |          |          |          |          |          |
|                                   | Lama2  | 309368 | laminin subunit alpha 2%2C transcript variant X1                          | 0.67335  | 1.862958 | 1.40216  | 1.174938 | 7.76E-10 | 0.072674 | 0.027227 |
| <b>PI3K-Akt signaling pathway</b> | Lamc3  | 311862 | laminin subunit gamma 3                                                   | 1.330097 | 4.420984 | 3.740406 | 2.499518 | 3.68E-07 | 0.520866 | 0.013937 |
|                                   | Tnc    | 116640 | tenascin C%2C transcript variant X2                                       | 0.369395 | 1.160301 | 0.581021 | 0.752895 | 1.52E-05 | 0.01544  | 0.087236 |

|        |        |                                                               |          |          |          |          |          |          |          |
|--------|--------|---------------------------------------------------------------|----------|----------|----------|----------|----------|----------|----------|
| Colla1 | 29393  | collagen%2C type I%2C<br>alpha 1                              | 3.008136 | 7.509262 | 6.127585 | 4.466024 | 0.000333 | 0.384752 | 0.03269  |
| Colla2 | 84352  | collagen type I alpha 2 chain                                 | 1.434895 | 4.491017 | 2.238209 | 2.45018  | 5.86E-05 | 0.096356 | 0.045279 |
| Col6a3 | 367313 | collagen type VI alpha 3<br>chain%2C transcript variant<br>X3 | 2.004719 | 5.196997 | 2.9723   | 2.779848 | 1.33E-06 | 0.00169  | 0.003658 |
| Igf1   | 24482  | insulin-like growth factor<br>1%2C transcript variant X2      | 1.270585 | 2.173341 | 1.322244 | 1.615256 | 0.000166 | 0.01114  | 0.018973 |
| Il6r   | 24499  | interleukin 6 receptor%2C<br>transcript variant X3            | 0.482404 | 1.180346 | 0.725067 | 0.867891 | 0.000514 | 0.022826 | 0.124558 |
| Hgf    | 24446  | hepatocyte growth<br>factor%2C transcript variant<br>X1       | 0.52943  | 2.186394 | 0.640202 | 0.751581 | 0.000519 | 0.042185 | 0.013426 |
| Ngfr   | 24596  | nerve growth factor receptor                                  | 0.124697 | 0.343179 | 0.303448 | 0.219767 | 0.000919 | 0.680736 | 0.019986 |

|                                      |         |        |                                                                                                      |          |          |          |          |          |          |          |
|--------------------------------------|---------|--------|------------------------------------------------------------------------------------------------------|----------|----------|----------|----------|----------|----------|----------|
|                                      | Fgf10   | 25443  | fibroblast growth factor 10                                                                          | 1.427312 | 2.950082 | 1.054515 | 1.551883 | 0.001153 | 7.78E-05 | 0.027459 |
|                                      | Itga11  | 315744 | integrin subunit alpha 11%2C transcript variant X2                                                   | 0.063095 | 0.266051 | 0.183434 | 0.122884 | 0.001534 | 0.308111 | 0.043345 |
|                                      | Csf3r   | 298518 | colony stimulating factor 3 receptor%2C transcript variant X7                                        | 0.114878 | 0.237507 | 0.126512 | 0.201489 | 0.003292 | 0.042175 | 0.470152 |
|                                      | Pik3cg  | 298947 | phosphatidylinositol-4%2C5-bisphosphate 3-kinase%2C catalytic subunit gamma%2C transcript variant X4 | 0.394424 | 1.012127 | 0.637459 | 0.802559 | 7.43E-05 | 0.047538 | 0.240065 |
|                                      | Pik3ap1 | 294048 | phosphoinositide-3-kinase adaptor protein 1%2C transcript variant X2                                 | 3.742369 | 5.91159  | 3.227079 | 4.562143 | 0.040961 | 0.038183 | 0.284879 |
| Toll-like receptor signaling pathway | TLR4    | 29260  | toll-like receptor 4                                                                                 | 0.519254 | 1.488081 | 0.811838 | 0.984717 | 5.17E-08 | 0.00234  | 0.013284 |
|                                      | TLR9    | 338457 | toll-like receptor 9                                                                                 | 0.064583 | 0.400321 | 0.104111 | 0.275298 | 0.000942 | 0.039877 | 0.436613 |

|                                   |        |        |                                                           |          |          |          |          |          |          |          |
|-----------------------------------|--------|--------|-----------------------------------------------------------|----------|----------|----------|----------|----------|----------|----------|
|                                   | Ctsk   | 29175  | cathepsin K                                               | 6.283218 | 14.88338 | 12.54954 | 9.473261 | 0.005412 | 0.448697 | 0.026934 |
|                                   | Map3k8 | 116596 | mitogen-activated protein<br>kinase kinase kinase 8       | 0.873254 | 1.506402 | 0.798035 | 1.210414 | 0.0085   | 0.013808 | 0.332358 |
| Chemokine<br>signaling<br>pathway | Prkcb  | 25023  | protein kinase C%2C<br>beta%2C transcript variant<br>X1   | 0.449119 | 0.991597 | 0.915111 | 0.700788 | 8.56E-05 | 0.702674 | 0.035259 |
|                                   | Elmo1  | 361251 | engulfment and cell motility<br>1                         | 0.115169 | 0.237926 | 0.134894 | 0.166798 | 0.001202 | 0.009807 | 0.040123 |
|                                   | Adcy3  | 64508  | adenylate cyclase 3                                       | 0.720147 | 1.269672 | 1.048119 | 0.747518 | 0.001921 | 0.23919  | 0.001883 |
|                                   | Ccl20  | 29538  | C-C motif chemokine ligand<br>20%2C transcript variant X1 | 1.272579 | 3.968931 | 2.337615 | 2.839513 | 8.48E-06 | 0.014034 | 0.318103 |
|                                   | Cxcl14 | 306748 | C-X-C motif chemokine<br>ligand 14                        | 0.63043  | 2.872617 | 2.353839 | 1.502387 | 0.000615 | 0.518419 | 0.013252 |



|                                  |       |        |                                                                 |          |          |          |          |          |          |          |
|----------------------------------|-------|--------|-----------------------------------------------------------------|----------|----------|----------|----------|----------|----------|----------|
|                                  | Ccr4  | 171054 | C-C motif chemokine<br>receptor 4%2C transcript<br>variant X1   | 0.054409 | 0.299426 | 0.219696 | 0.154245 | 0.008624 | 0.364936 | 0.040034 |
|                                  | Ccr5  | 117029 | chemokine (C-C motif)<br>receptor 5%2C transcript<br>variant X1 | 0.417682 | 1.565365 | 0.610788 | 0.870348 | 0.000193 | 0.046951 | 0.06277  |
|                                  | Cxcr4 | 60628  | C-X-C motif chemokine<br>receptor 4                             | 2.046051 | 3.691624 | 2.018142 | 2.529716 | 0.031424 | 0.002021 | 0.053425 |
|                                  | Cxcr6 | 1E+08  | C-X-C motif chemokine<br>receptor 6                             | 0.754925 | 2.371866 | 0.877056 | 1.376069 | 0.033403 | 0.035149 | 0.242439 |
| Jak-STAT<br>signaling<br>pathway | Aox1  | 54349  | aldehyde oxidase 1%2C<br>transcript variant X1                  | 0.372369 | 1.580103 | 0.707232 | 1.00384  | 6.79E-09 | 0.001617 | 0.136667 |
|                                  | Aox3  | 493909 | aldehyde oxidase 3                                              | 0.074322 | 0.314513 | 0.080106 | 0.15076  | 0.000113 | 0.001185 | 0.041306 |
|                                  | Lepr  | 24536  | leptin receptor                                                 | 0.376949 | 2.375132 | 0.648944 | 0.732255 | 0.000305 | 0.019113 | 0.009547 |

|                                              |        |        |                                                                                                                      |          |          |          |          |          |          |          |
|----------------------------------------------|--------|--------|----------------------------------------------------------------------------------------------------------------------|----------|----------|----------|----------|----------|----------|----------|
|                                              | Il10ra | 117539 | interleukin 10 receptor<br>subunit alpha%2C transcript<br>variant X1                                                 | 0.882465 | 1.853247 | 1.09829  | 1.457476 | 0.00085  | 0.005148 | 0.179241 |
|                                              | Akt3   | 29414  | AKT serine/threonine kinase<br>3                                                                                     | 1.414656 | 2.602654 | 1.435131 | 1.560748 | 0.018587 | 0.070881 | 0.029536 |
| NOD-like<br>receptor<br>signaling<br>pathway | Antxr2 | 305633 | anthrax toxin receptor 2%2C<br>transcript variant X1                                                                 | 1.626702 | 3.328393 | 2.663078 | 2.596613 | 1.11E-05 | 0.054221 | 0.034234 |
|                                              | Casp12 | 156117 | caspase 12                                                                                                           | 0.696534 | 2.618516 | 1.284813 | 2.186887 | 1.38E-05 | 0.028566 | 0.597839 |
|                                              | Ikbke  | 363984 | inhibitor of kappa light<br>polypeptide gene enhancer in<br>B-cells%2C kinase<br>epsilon%2C transcript variant<br>X1 | 1.040737 | 1.957693 | 1.245845 | 1.500713 | 0.001063 | 0.007868 | 0.210582 |
|                                              | Nlrp3  | 287362 | NLR family%2C pyrin<br>domain containing 3%2C<br>transcript variant X2                                               | 0.246916 | 0.655082 | 0.284121 | 0.477519 | 0.003473 | 0.034057 | 0.277912 |

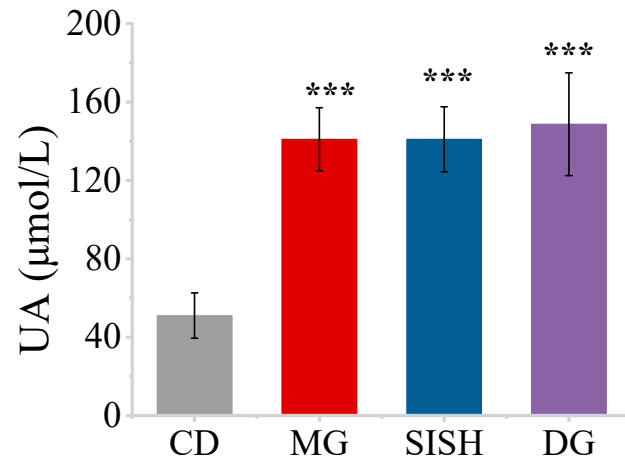

Figure S1. The serum UA levels in rats after adenine and potassium oxonate treatment for 10 days. \*\*\* $p < 0.001$  vs. CD

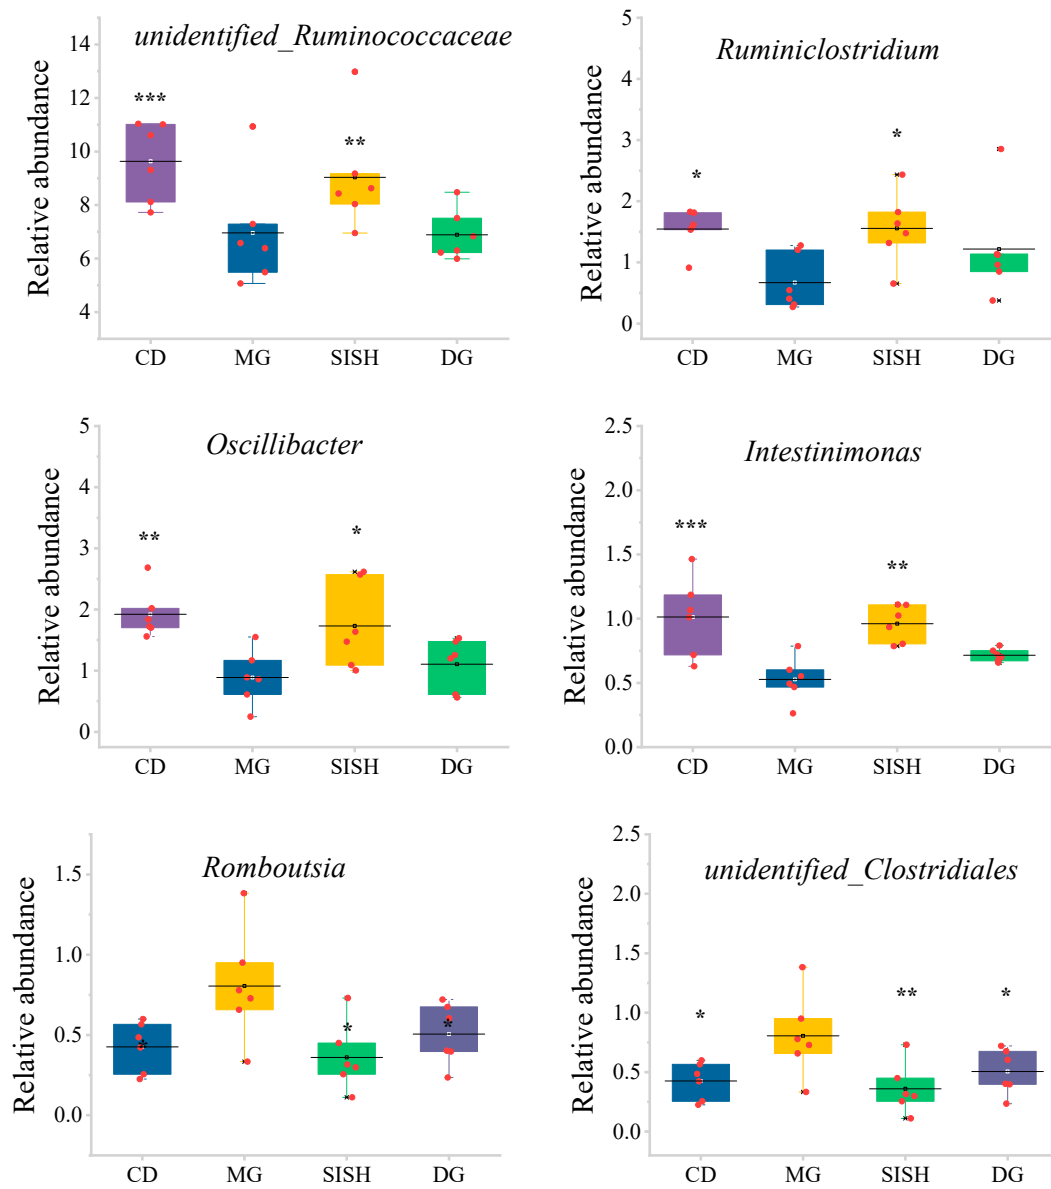

Figure S2. The comparison of several specific taxa between the four groups.

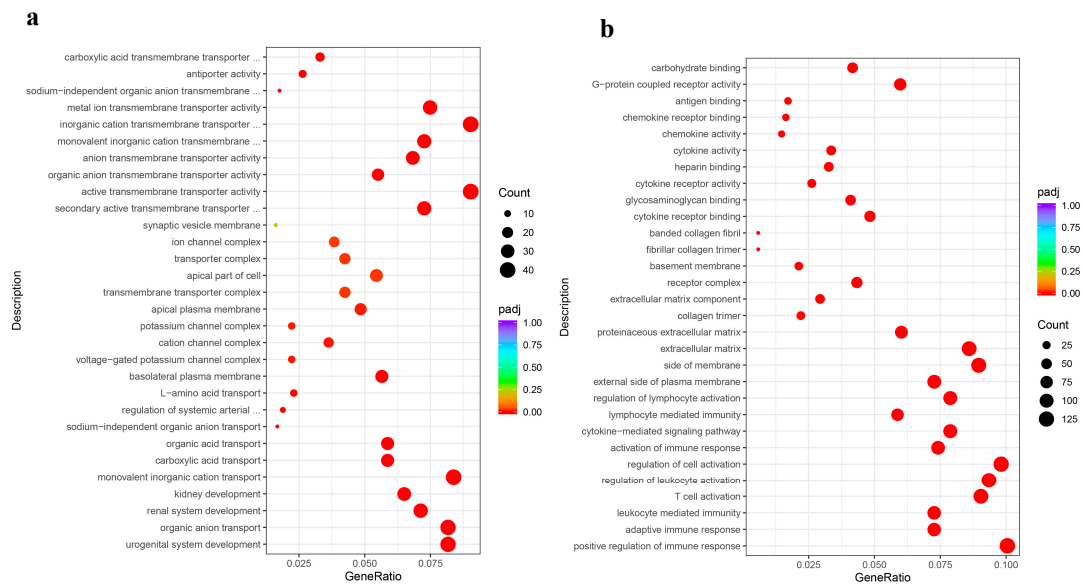

Figure S3. GO enrichment analysis between the CD and MG group.

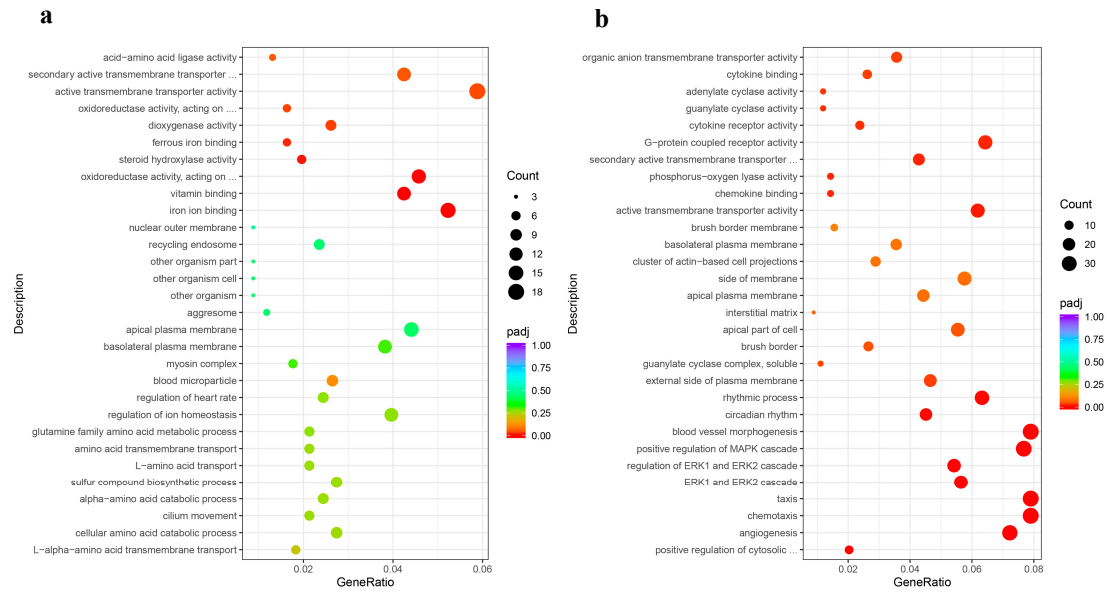

Fig. S4 GO enrichment analysis between the SISH and MG group.
